# Supplementary material for: A quantitative method to assess extrasynaptic NMDA receptor function in the protective effect of synaptic activity against neurotoxicity
Source: PubMed Central journal article supplement (PMC2267199; doi:10.1186/1471-2202-9-11), 2008-01-24

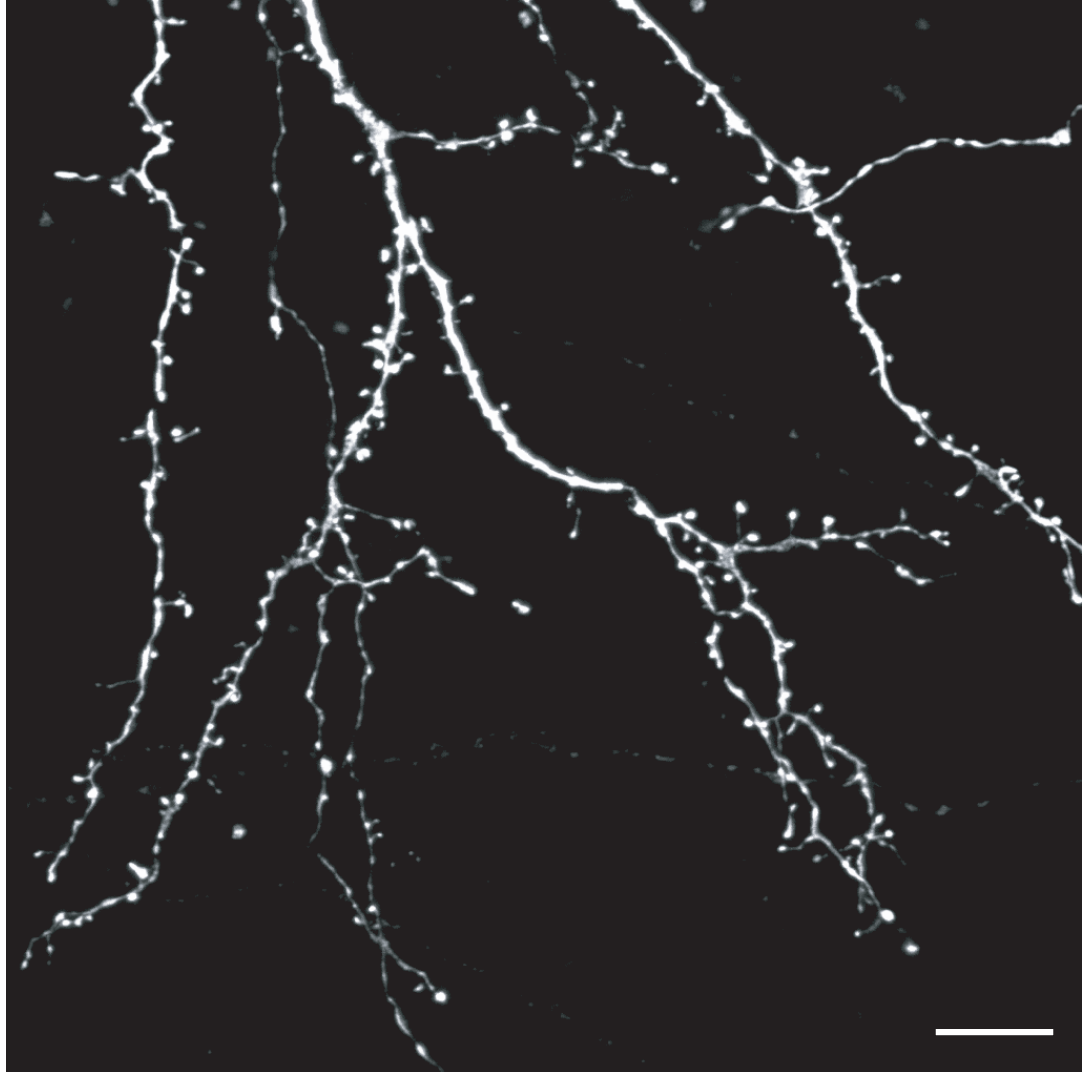

Supplement: 1471-2202-9-11-S1.pdf [file 1471-2202-9-11-S1.pdf]
